# Supplementary material for: Why resilience is unappealing to social science: Theoretical and empirical investigations of the scientific use of resilience
Source: PubMed Central journal article supplement — Sci Adv. 2015 May 22;1(4):e1400217. doi: 10.1126/sciadv.1400217 (PMC4640643; doi:10.1126/sciadv.1400217), 2015-05-22
Supplement: 1400217_SM.pdf [file 1400217_SM.pdf]

## Supplementary Materials for

### **Why resilience is unappealing to social science: Theoretical and empirical investigations of the scientific use of resilience**

Lennart Olsson, Anne Jerneck, Henrik Thoren, Johannes Persson, David O'Byrne

Published 22 May 2015, *Sci. Adv.* **1**, e1400217 (2015)

DOI: 10.1126/sciadv.1400217

**Other Supplementary Material for this manuscript includes the following:**  
(available at [www.advances.sciencemag.org/cgi/content/full/1/4/e1400217/DC1](http://www.advances.sciencemag.org/cgi/content/full/1/4/e1400217/DC1))

Data file S1 (Microsoft Excel format). Complete list of journals used in the bibliometric analysis including the number of articles for each combination of search terms.
